# Supplementary material
Source: PubMed Central journal article supplement (PMC5391776)
Supplement: ijme-4-26-S1.pdf [file ijme-4-26-S1.pdf]

## Appendix I

### Databases searched and search strategies

|                                                                                                                                                                                                                                                                                                                                                                                                                                                                                                                                                                                                                                                                                                                                                                         |
|-------------------------------------------------------------------------------------------------------------------------------------------------------------------------------------------------------------------------------------------------------------------------------------------------------------------------------------------------------------------------------------------------------------------------------------------------------------------------------------------------------------------------------------------------------------------------------------------------------------------------------------------------------------------------------------------------------------------------------------------------------------------------|
| <b>ERIC</b><br>KW = premed* OR DE = (“premedical students”) OR (DE = (“medical education”)<br>AND DE = (“undergraduate study”))                                                                                                                                                                                                                                                                                                                                                                                                                                                                                                                                                                                                                                         |
| <b>JSTOR</b><br>premedical                                                                                                                                                                                                                                                                                                                                                                                                                                                                                                                                                                                                                                                                                                                                              |
| <b>PubMed</b><br><i>(race/ethnicity)</i><br>“Education, Premedical”[Mesh] AND (“race”[All Fields] OR “ethnicity”[All Fields]<br>OR “ethnic”[All Fields] OR “racial”[All Fields] OR “diversity”[All Fields] OR<br>“minority”[All Fields] OR “Continental Population Groups”[Mesh] OR “Race<br>Relations”[Mesh] OR “Asian Continental Ancestry Group”[Mesh] OR “European<br>Continental Ancestry Group”[Mesh] OR “Oceanic Ancestry Group”[Mesh] OR<br>“African Continental Ancestry Group”[Mesh] OR “Ethnic Groups”[Mesh])<br><i>gender</i><br>“Education, Premedical”[Mesh] AND (“Gender”[All Fields] OR “Female”[Majr]<br>OR “Male”[Majr] OR “Gender Identity”[Mesh])<br><i>history</i><br>“Education, Premedical”[Mesh] AND (“History”[Mesh] OR “history”[Subheading]) |
| <b>Scopus</b><br>TITLE-ABS-KEY(premedical AND education)                                                                                                                                                                                                                                                                                                                                                                                                                                                                                                                                                                                                                                                                                                                |
| <b>ISI Web of Science</b><br>Topic = (premedical AND education)                                                                                                                                                                                                                                                                                                                                                                                                                                                                                                                                                                                                                                                                                                         |
| <b>PsycInfo</b><br>(premed* AND education) OR premedical                                                                                                                                                                                                                                                                                                                                                                                                                                                                                                                                                                                                                                                                                                                |
